# Supplementary material
Source: PubMed Central journal article supplement (PMC373508)
Supplement: pnas_0400326101_5.pdf [file pnas_0400326101_5.pdf]

\*

SGH MCPDNTHAKKQYLTPGNDIHYPGQTNHDACFIPVSVRQYA  
 CaiF MCEG-----YV  
 Gr1A M-----ESKNSDYVIPDSVKNYN

\*\*\*++++ \*    +++\*+    +\*+    \*\*    +\*    ++

SGH GEPLYIIVAHWCLLQQNWVQRNQIAEAFHITARRASYLIA  
 CaiF EKPLYLLIAEWMMAENRWVIAREISIHFDIEHASKAVNTLT  
 Gr1A GEPLYILVSLWCKLQEKWISRNDIAEAFGINLRRASFIIT  
Helix-turn-helix motif

\*+            +            +            +            +            +            +\*+

SGH YLRSKTSRVVSICRHQTLPN-KARRYEIIY-VIRVLDSPPTP  
 CaiF YILSEVTEISCEVKMIP-NKLEGRGCQCQRLVKVVDIDEQ  
 Gr1A YISRRKEKISFRVRYVSYGNLHYKRLEIF-IYNVNLEAAP

+            +                            \*+                            \*+ +

SGH STRREKAGPP-----LVSKRRVGNNGDRSM--ANELWNRLC  
 CaiF IYARLRNNSREKLVGVRKTPRIPAVPLTELNREQKWQMM-  
 Gr1A TESHVSTGPK-----RKTLRVGNGIVG---QSSIWNEM-

+++\* +            +

SGH SNRNAGKILKKKEDEDDGT **(170 aa)**  
 CaiF ----LSKSMRR **(131 aa)**  
 Gr1A -----IMRRKKE----S **(135 aa)**
