# Supplementary material
Source: PubMed Central journal article supplement (PMC373508)

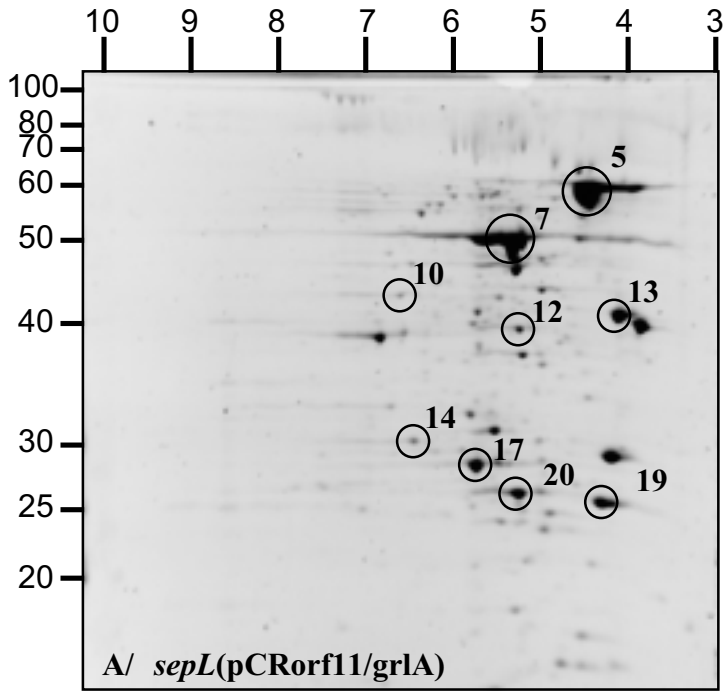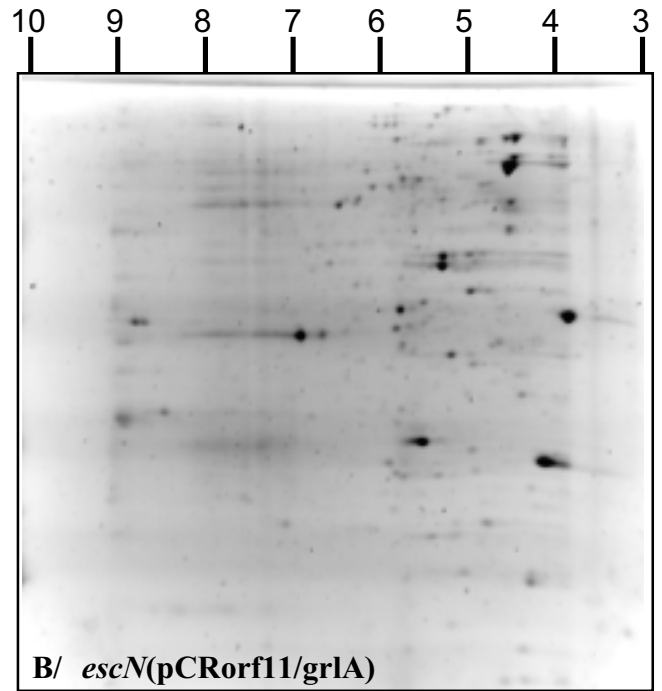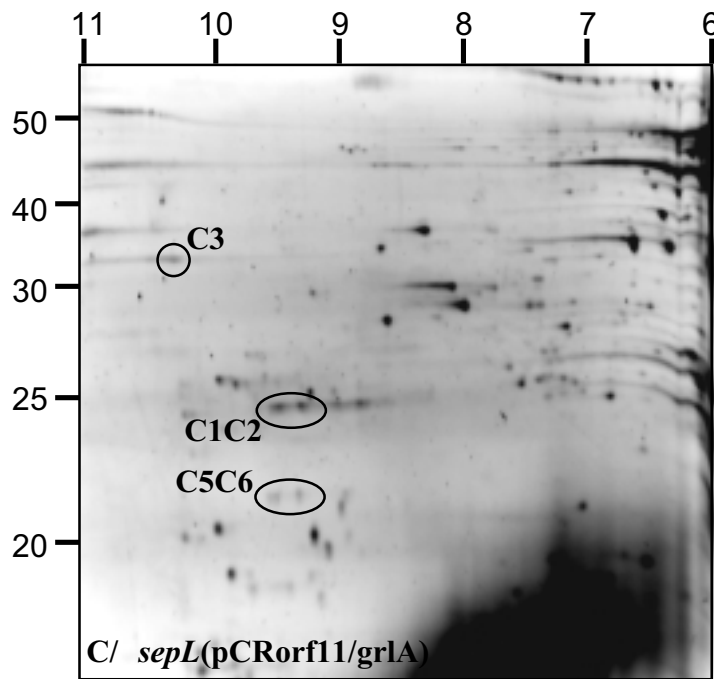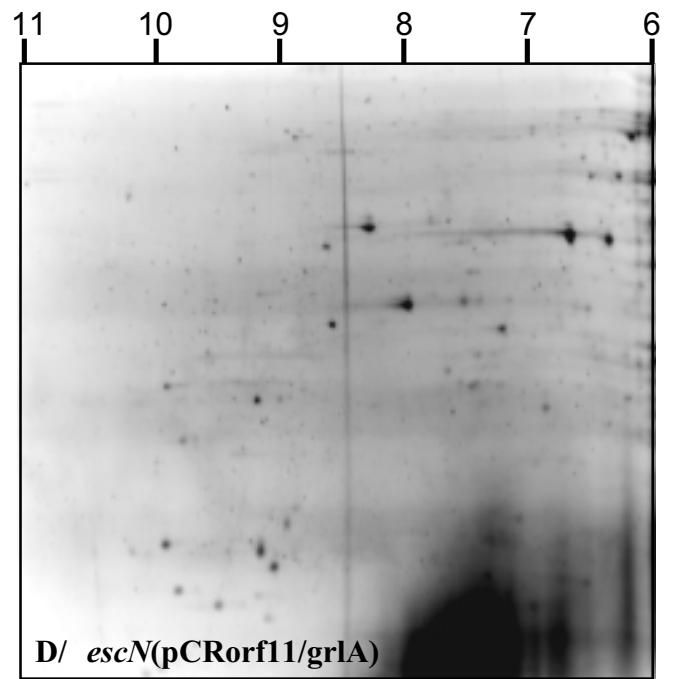

Supplement: pnas_0400326101_11.pdf [file pnas_0400326101_11.pdf]
